# Supplementary material for: The combination therapy of isomucronulatol 7-O-beta-glucoside (IMG) and CEP-9722 targeting ferroptosis-related biomarkers in non-small cell lung cancer (NSCLC)
Source: PubMed Central journal article supplement (PMC10173508; doi:10.1186/s12890-023-02445-0), 2023-05-11

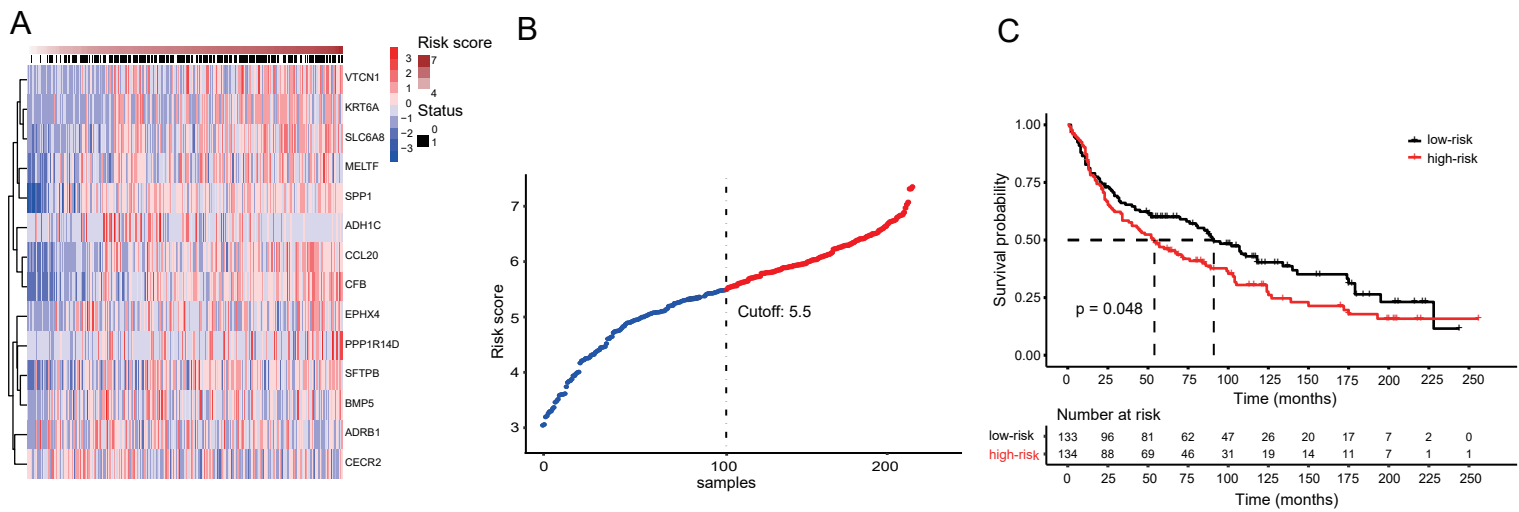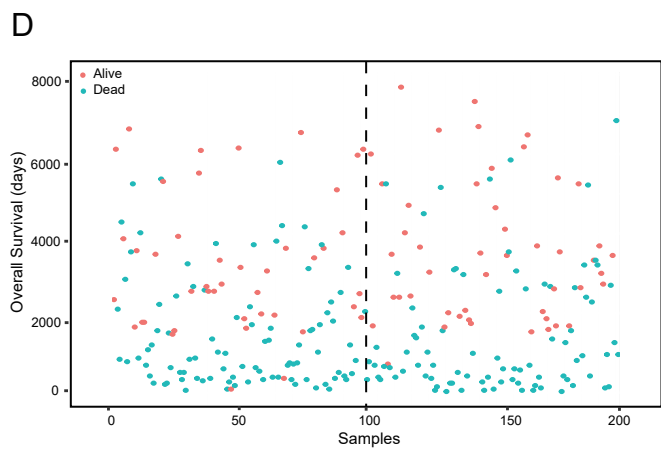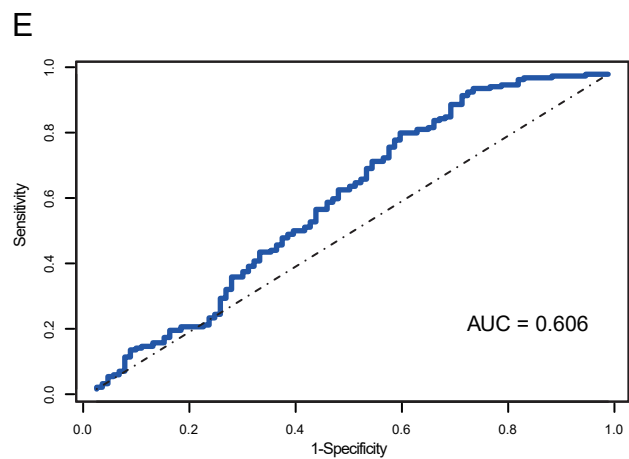

Supplement: 12890_2023_2445_MOESM3_ESM.pdf [file 12890_2023_2445_MOESM3_ESM.pdf]
