# Supplementary material for: The combination therapy of isomucronulatol 7-O-beta-glucoside (IMG) and CEP-9722 targeting ferroptosis-related biomarkers in non-small cell lung cancer (NSCLC)
Source: PubMed Central journal article supplement (PMC10173508; doi:10.1186/s12890-023-02445-0), 2023-05-11

<sup>1</sup>H NMR (400 MHz, METHANOL-*d*<sub>4</sub>) δ ppm 2.85 (dd, *J*=15.81, 4.02 Hz, 1 H) 3.00 (dd, *J*=15.81, 10.79 Hz, 1 H) 3.34 - 3.55 (m, 5 H) 3.71 (dd, *J*=12.05, 4.77 Hz, 1 H) 3.81 (s, 3 H) 3.80 (s, 3 H) 3.87 - 3.94 (m, 1 H) 4.00 (t, *J*=10.04 Hz, 1 H) 4.19 - 4.39 (m, 1 H) 4.86 (br. s., 1 H) 6.46 (d, *J*=8.53 Hz, 1 H) 6.55 (d, *J*=2.51 Hz, 1 H) 6.62 (dd, *J*=8.28, 2.51 Hz, 1 H) 6.78 (d, *J*=8.78 Hz, 1 H) 6.98 (d, *J*=8.28 Hz, 1 H)

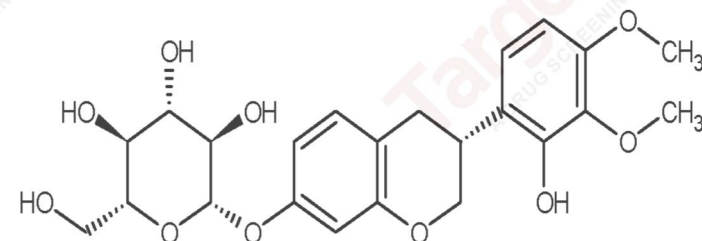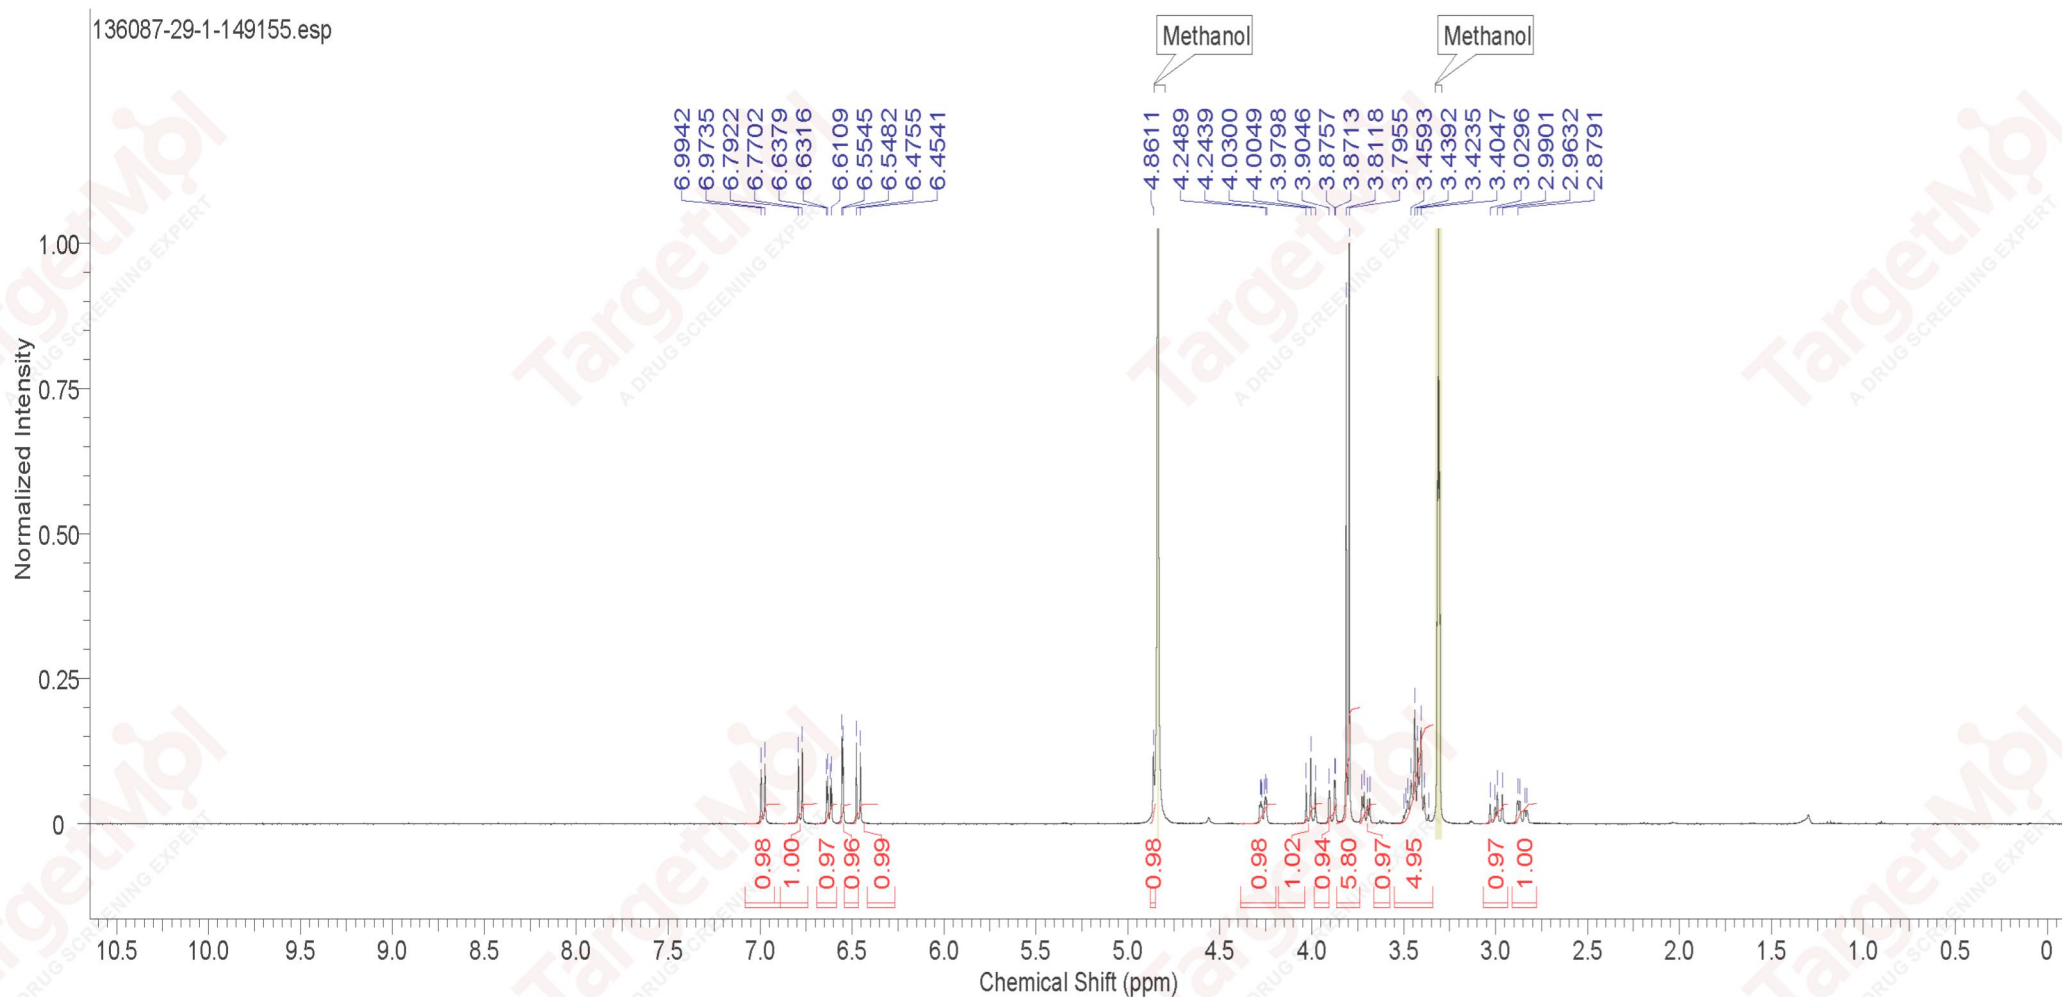

Supplement: 12890_2023_2445_MOESM14_ESM.pdf [file 12890_2023_2445_MOESM14_ESM.pdf]
