# Supplementary material for: The combination therapy of isomucronulatol 7-O-beta-glucoside (IMG) and CEP-9722 targeting ferroptosis-related biomarkers in non-small cell lung cancer (NSCLC)
Source: Springer Nature journal article supplement (doi:10.1186/s12890-023-02445-0), 2023-05-10

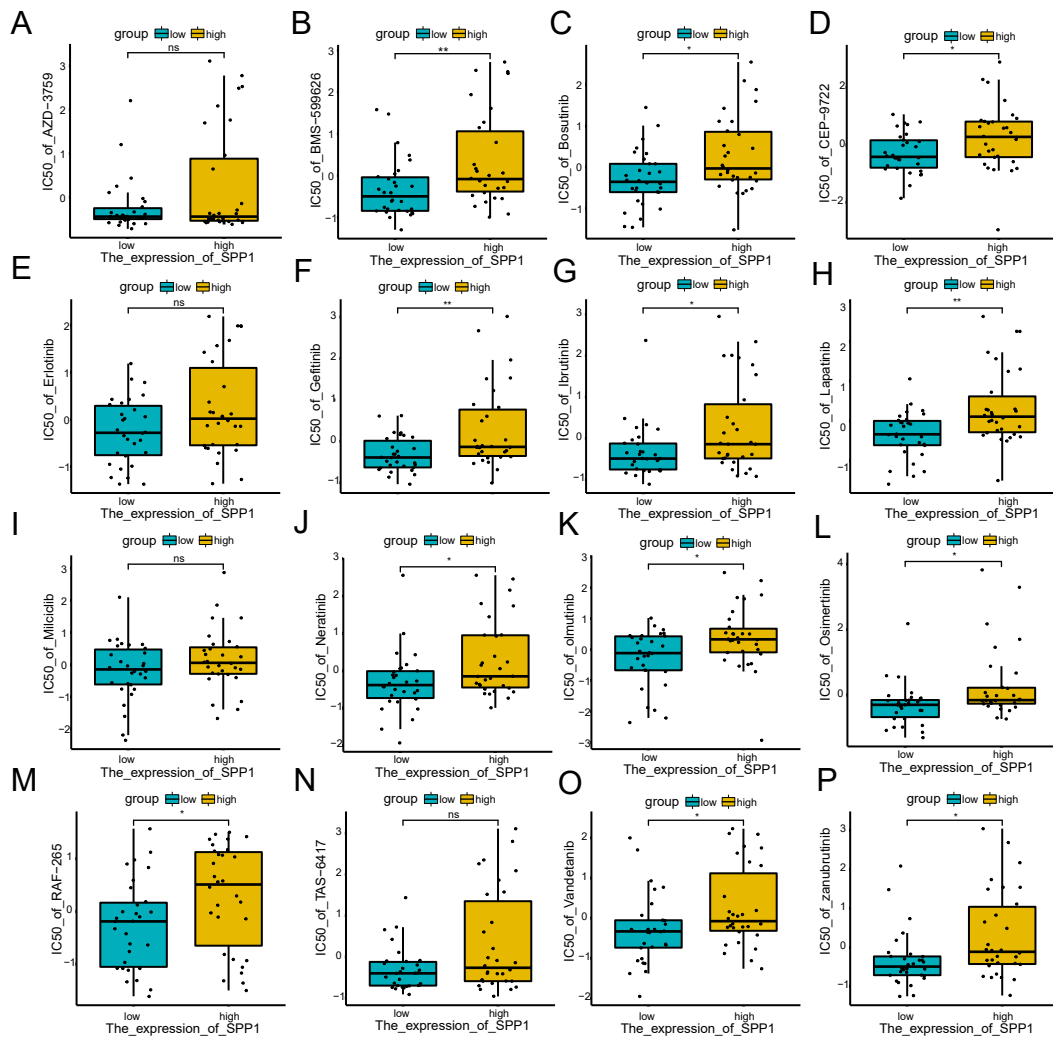

Supplement: MOESM6 [file 25341382]
